# Supplementary material for: Influence of the ionic liquid on the rate and the mechanism of reaction of p-nitrophenyl acetate with secondary alicyclic amines
Source: Royal Society of Chemistry journal article supplement (doi:10.1039/c3nj00781b), 2013-01-01
Supplement: c3nj00781b.pdf [file c3nj00781b.pdf]

## INFLUENCE OF THE IONIC LIQUID ON RATE AND MECHANISM OF REACTION OF P-NITROPHENYL ACETATE WITH SECONDARY ALICYCLIC AMINES

Daniela Millán\*<sup>1</sup>, Mabel Rojas<sup>1</sup>, Paulina Pavez<sup>1</sup>, Mauricio Isaacs<sup>2</sup>, Carlos Diaz<sup>2</sup> and José G. Santos<sup>1</sup>

<sup>1</sup>Departamento de Fisicoquímica, Facultad de Química, Pontificia Universidad Católica de Chile, Casilla 306, Santiago, Chile.

<sup>2</sup> Departamento de Química Inorgánica, Pontificia Universidad Católica de Chile, Casilla 306, Santiago, Chile

### Electronic supplementary information

| Table of contents                                                                                                                                                 |    |
|-------------------------------------------------------------------------------------------------------------------------------------------------------------------|----|
| <b>Table S1</b> : Pseudo-first-order rate constants ( $k_{\text{obs}}$ ) for the reaction of NPA ( <b>1</b> ) with SA amines in [Bmim]BF <sub>4</sub> .           | S2 |
| <b>Table S2</b> : Pseudo-first-order rate constants ( $k_{\text{obs}}$ ) for the reaction of NPA ( <b>1</b> ) with piperidine in different ionic liquids.         | S3 |
| <b>Table S3</b> : Experimental conditions and pseudo-first-order rate constants for the reaction of NPA ( <b>1</b> ) with piperidine in organic solvents at 25°C. | S4 |
| <b>Figure S1</b> : Bronsted type plot using relatives basicities ( $K_{\text{rel}}$ ) of alicyclic amines in [Bmim]BF <sub>4</sub> .                              | S5 |
| <b>Figure S2</b> : Voltammogram of piperidine+ strong acid HOTf in [Bmim]BF <sub>4</sub>                                                                          | S5 |
| <b>Figure S3</b> : Voltammogram of morpholine+ strong acid HOTf in [Bmim]BF <sub>4</sub>                                                                          | S6 |

## Tables

**Table S-1.** Pseudo-first-order rate constants ( $k_{\text{obs}}$ ) for the reaction of NPA (**1**) with SA amines in [Bmim]BF<sub>4</sub>.

| Piperidine             |                                    |
|------------------------|------------------------------------|
| [A] <sub>T</sub> / [M] | $k_{\text{obs}}$ / s <sup>-1</sup> |
| 0,0087                 | 0,01665                            |
| 0,01087                | 0,0308                             |
| 0,01304                | 0,03747                            |
| 0,01522                | 0,05661                            |
| 0,01739                | 0,06475                            |
| 0,01956                | 0,08272                            |
| 0,02174                | 0,09036                            |

| Formylpiperazine       |                                    |
|------------------------|------------------------------------|
| [A] <sub>T</sub> / [M] | $k_{\text{obs}}$ / s <sup>-1</sup> |
| 0,02174                | 7,8E-4                             |
| 0,04348                | 0,00164                            |
| 0,06522                | 0,00251                            |
| 0,08696                | 0,00336                            |

| Morpholine             |                                    |
|------------------------|------------------------------------|
| [A] <sub>T</sub> / [M] | $k_{\text{obs}}$ / s <sup>-1</sup> |
| 0,0087                 | 1,1E-4                             |
| 0,01087                | 0,00153                            |
| 0,01304                | 0,00236                            |
| 0,01522                | 0,00437                            |
| 0,01739                | 0,00493                            |
| 0,02174                | 0,00712                            |

| 1-(2-hydroxyethyl)-piperazine |                                    |
|-------------------------------|------------------------------------|
| [A] <sub>T</sub> / [M]        | $k_{\text{obs}}$ / s <sup>-1</sup> |
| 0,0087                        | 0,00393                            |
| 0,01087                       | 0,00568                            |
| 0,01304                       | 0,0079                             |
| 0,01522                       | 0,00966                            |
| 0,01739                       | 0,01123                            |
| 0,01956                       | 0,01296                            |

**Table S-2.** Pseudo-first-order rate constants ( $k_{\text{obs}}$ ) for the reaction of NPA (1) with piperidine in different ionic liquids.

| [Bmim]BF <sub>4</sub>  |                                    |
|------------------------|------------------------------------|
| [A] <sub>T</sub> / [M] | $k_{\text{obs}}$ / s <sup>-1</sup> |
| 0,0087                 | 0,01665                            |
| 0,01087                | 0,0308                             |
| 0,01304                | 0,03747                            |
| 0,01522                | 0,05661                            |
| 0,01739                | 0,06475                            |
| 0,01956                | 0,08272                            |
| 0,02174                | 0,09036                            |

| [Bm <sub>2</sub> im]BF <sub>4</sub> |                                    |
|-------------------------------------|------------------------------------|
| [A] <sub>T</sub> / [M]              | $k_{\text{obs}}$ / s <sup>-1</sup> |
| 0,0087                              | 0,01271                            |
| 0,01304                             | 0,01902                            |
| 0,01522                             | 0,0214                             |
| 0,01739                             | 0,02465                            |
| 0,01956                             | 0,02605                            |
| 0,02174                             | 0,02851                            |

| [Bm <sub>2</sub> im]ntf <sub>2</sub> |                                    |
|--------------------------------------|------------------------------------|
| [A] <sub>T</sub> / [M]               | $k_{\text{obs}}$ / s <sup>-1</sup> |
| 0,0087                               | 0,01728                            |
| 0,01087                              | 0,02407                            |
| 0,01304                              | 0,03134                            |
| 0,01522                              | 0,03902                            |
| 0,01739                              | 0,04515                            |
| 0,01956                              | 0,05236                            |
| 0,02174                              | 0,05858                            |

| [Bmim]DCA              |                                    |
|------------------------|------------------------------------|
| [A] <sub>T</sub> / [M] | $k_{\text{obs}}$ / s <sup>-1</sup> |
| 0,0087                 | 0,03715                            |
| 0,01087                | 0,04909                            |
| 0,01304                | 0,05144                            |
| 0,01522                | 0,06326                            |
| 0,01739                | 0,06873                            |
| 0,01956                | 0,07979                            |
| 0,02174                | 0,08711                            |

| [Bmim]PF <sub>6</sub>  |                                    |
|------------------------|------------------------------------|
| [A] <sub>T</sub> / [M] | $k_{\text{obs}}$ / s <sup>-1</sup> |
| 0,0087                 | 0,00458                            |
| 0,01087                | 0,00554                            |
| 0,01304                | 0,00617                            |
| 0,01522                | 0,00662                            |
| 0,01956                | 0,00866                            |
| 0,02174                | 0,00893                            |

**Table S-3.** Experimental conditions and pseudo-first-order rate constants for the reaction of NPA (1) with piperidine in organic solvents at 25°C.

| <b>Acetonitrile</b>       |                                           | <b>Ethanol</b>          |                                           |
|---------------------------|-------------------------------------------|-------------------------|-------------------------------------------|
| [A] <sub>T</sub> / [M]    | <i>k</i> <sub>obs</sub> / s <sup>-1</sup> | [A] <sub>T</sub> / [M]  | <i>k</i> <sub>obs</sub> / s <sup>-1</sup> |
| 0,0087                    | 0,01868                                   | 0,0087                  | 0,00443                                   |
| 0,01087                   | 0,02379                                   | 0,01087                 | 0,00507                                   |
| 0,01304                   | 0,02831                                   | 0,01304                 | 0,00619                                   |
| 0,01522                   | 0,03331                                   | 0,01522                 | 0,00691                                   |
| 0,01739                   | 0,03864                                   | 0,01739                 | 0,00793                                   |
| 0,01956                   | 0,0433                                    | 0,02174                 | 0,00976                                   |
| 0,02174                   | 0,04839                                   |                         |                                           |
| <b>Dimethylsulphoxide</b> |                                           | <b>Dichlorometane</b>   |                                           |
| [A] <sub>T</sub> / [M]    | <i>k</i> <sub>obs</sub> / s <sup>-1</sup> | [A] <sub>T</sub> / [M]  | <i>k</i> <sub>obs</sub> / s <sup>-1</sup> |
| 0,0162                    | 0,15855                                   | 0,00806                 | 6,0963E-4                                 |
| 0,0243                    | 0,48983                                   | 0,0322                  | 0,00358                                   |
| 0,0322                    | 0,83393                                   | 0,0522                  | 0,00583                                   |
|                           |                                           | 0,0681                  | 0,00838                                   |
|                           |                                           | 0,088                   | 0,0117                                    |
| <b>Heptane</b>            |                                           | <b>Acetone</b>          |                                           |
| [A] <sub>T</sub> / [M]    | <i>k</i> <sub>obs</sub> / s <sup>-1</sup> | [A] <sub>T</sub> / [M]  | <i>k</i> <sub>obs</sub> / s <sup>-1</sup> |
| 0,0522                    | 9,1432E-4                                 | 0,0087                  | 0,01333                                   |
| 0,0681                    | 0,00173                                   | 0,01087                 | 0,02008                                   |
| 0,088                     | 0,00268                                   | 0,01304                 | 0,02564                                   |
| 0,1077                    | 0,00366                                   | 0,01522                 | 0,03153                                   |
| 0,1274                    | 0,00463                                   |                         |                                           |
| <b>Methanol</b>           |                                           | <b>Tetrahydrofurane</b> |                                           |
| [A] <sub>T</sub> / [M]    | <i>k</i> <sub>obs</sub> / s <sup>-1</sup> | [A] <sub>T</sub> / [M]  | <i>k</i> <sub>obs</sub> / s <sup>-1</sup> |
| 0,00806                   | 0,00168                                   | 0,0087                  | 0,0123                                    |
| 0,0322                    | 0,00371                                   | 0,01087                 | 0,01593                                   |
| 0,0522                    | 0,00605                                   | 0,01522                 | 0,02197                                   |
| 0,0681                    | 0,00772                                   | 0,01956                 | 0,02784                                   |
|                           |                                           | 0,02174                 | 0,03305                                   |

## Figures

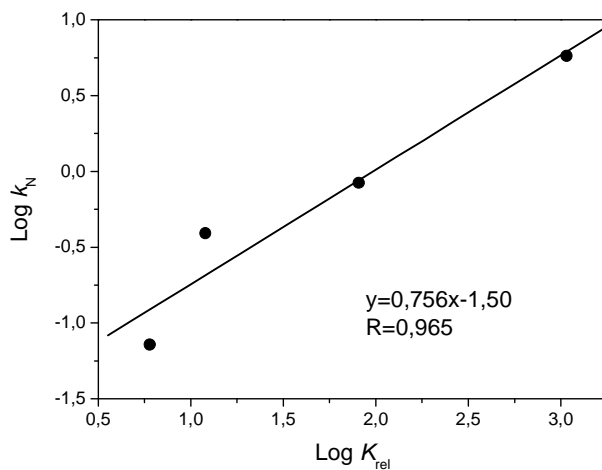

**Figure S-1** : Bronsted type plot using relative basicities ( $K_{rel}$ ) of alicyclic amines in [Bmim]BF<sub>4</sub>.

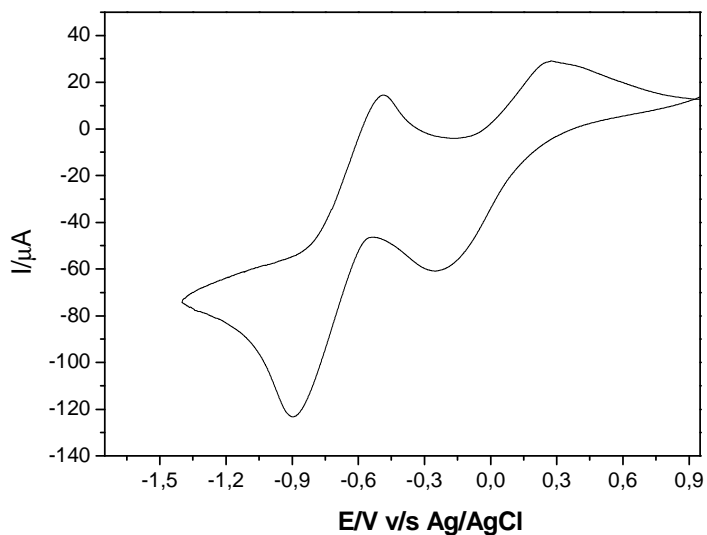

**Figure S-2** : Voltammogram of piperidine (0.046M) in [Bmim]BF<sub>4</sub> (0.02Vs<sup>-1</sup>) + strong acid HOTf (0.23M).

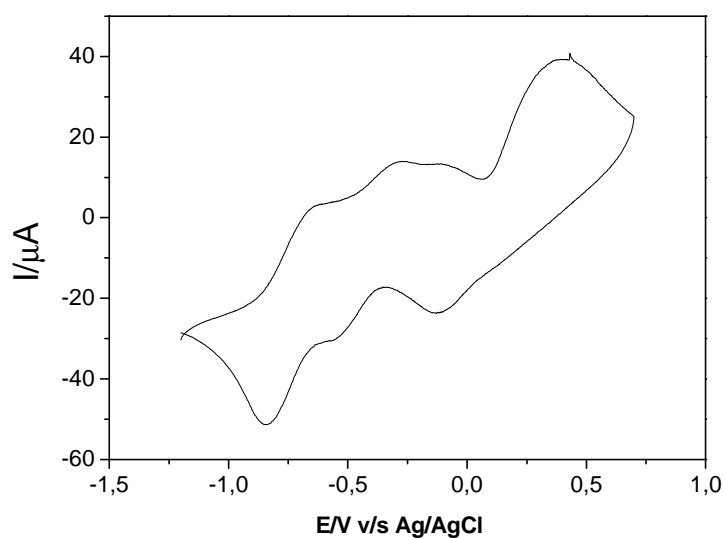

**Figure S-3** : Voltammogram of morpholine ( 0.046M) in [Bmim]BF<sub>4</sub> ( $0.02 \text{ V s}^{-1}$ ) + strong acid HOTf (0.23M).
